# Supplementary material
Source: PubMed Central journal article supplement (PMC2048780)
Supplement: plntphys_pp.107.107318_7.pdf [file plntphys_pp.107.107318_7.pdf]

## Supplementary Figures

### Figure S1

Response of net CO<sub>2</sub> assimilation rate,  $A$  and transpiration rate,  $Tr$ , to photosynthetic photon flux density (PPFD) in sunflower (*Helianthus annuus*) with (covered) and without (control) 12 × 5.8 mm diameter grease patches applied to both leaf surfaces covering approximately half the leaf area; n = 3, bars indicate s.e.m. Ratio of assimilation rate and transpiration rate when covered and uncovered,  $A^c/A$  and  $Tr^c/Tr$  shown on right hand axes. Leaf temperature = 25°C, VPD = 0.8 kPa, chamber CO<sub>2</sub> ≈ 370 μmol mol<sup>-1</sup> and 21% O<sub>2</sub>.

### Figure S2

Response of net CO<sub>2</sub> assimilation rate,  $A$  and transpiration rate,  $Tr$ , to photosynthetic photon flux density (PPFD) in faba bean (*Vicia faba*) with (covered) and without (control) grease patches covering approximately half the leaf area. n = 3. Other details as in Figure S1, except chamber CO<sub>2</sub> = 360 μmol mol<sup>-1</sup>.

### Figure S3.

Response of net CO<sub>2</sub> assimilation rate,  $A$  and transpiration rate,  $Tr$ , to photosynthetic photon flux density (PPFD) in dwarf bean (*Phaseolus vulgaris*) with (covered) and without (control) grease patches covering approximately half the leaf area. n = 4. Other details as in Figure S2.

### Figure S4.

Response of net CO<sub>2</sub> assimilation rate,  $A$  and transpiration rate,  $Tr$ , to photosynthetic photon flux density (PPFD) in maize (*Zea mays*) with (covered) and without (control) grease patches covering approximately half the leaf area. n = 5. Other details as in Figure S2.

### Figure S5.

Response of net CO<sub>2</sub> assimilation rate,  $A$  and transpiration rate,  $Tr$ , to photosynthetic photon flux density (PPFD) in faba bean (*Vicia faba*) with (covered) and without (control) small grease patches (4.5 mm diameter) covering approximately half the leaf area. n = 3. Other details as in Figure S2.

### Figure S6.

Response of net CO<sub>2</sub> assimilation rate,  $A$  and transpiration rate,  $Tr$ , to photosynthetic photon flux density (PPFD) in sunflower (*Helianthus annuus*) with (covered) and without (control) grease patches covering approximately half the leaf area. n = 5. Chamber CO<sub>2</sub> ≈ 1450 μmol mol<sup>-1</sup>, other details as in Figure S1.
