# Supplementary material
Source: PubMed Central journal article supplement (PMC2048780)

Figure S2

### Faba bean

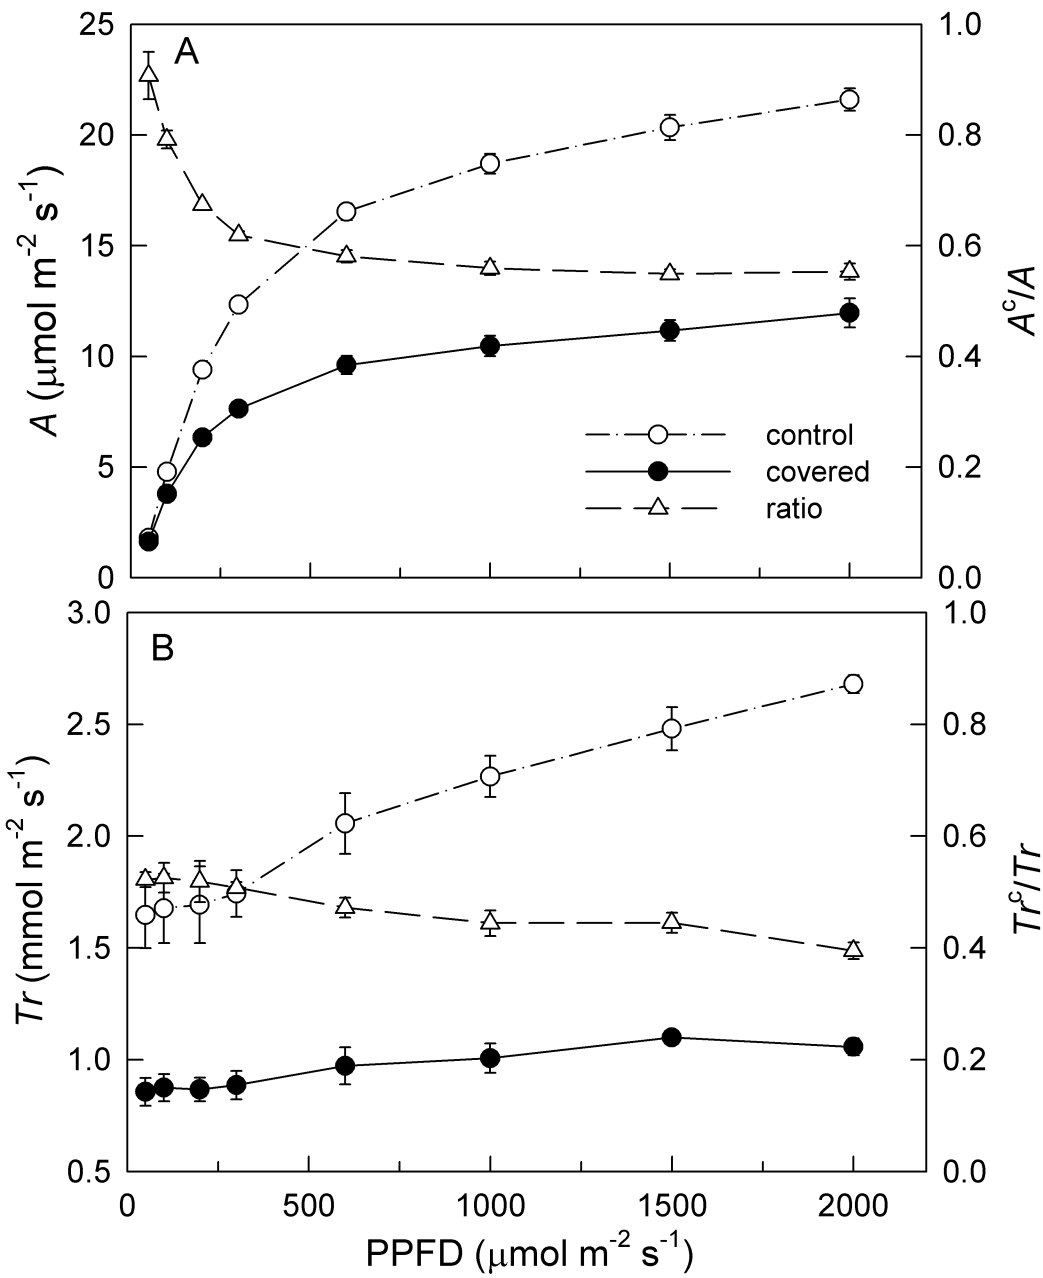

Supplement: plntphys_pp.107.107318_2.pdf [file plntphys_pp.107.107318_2.pdf]

Figure S3

### Dwarf bean

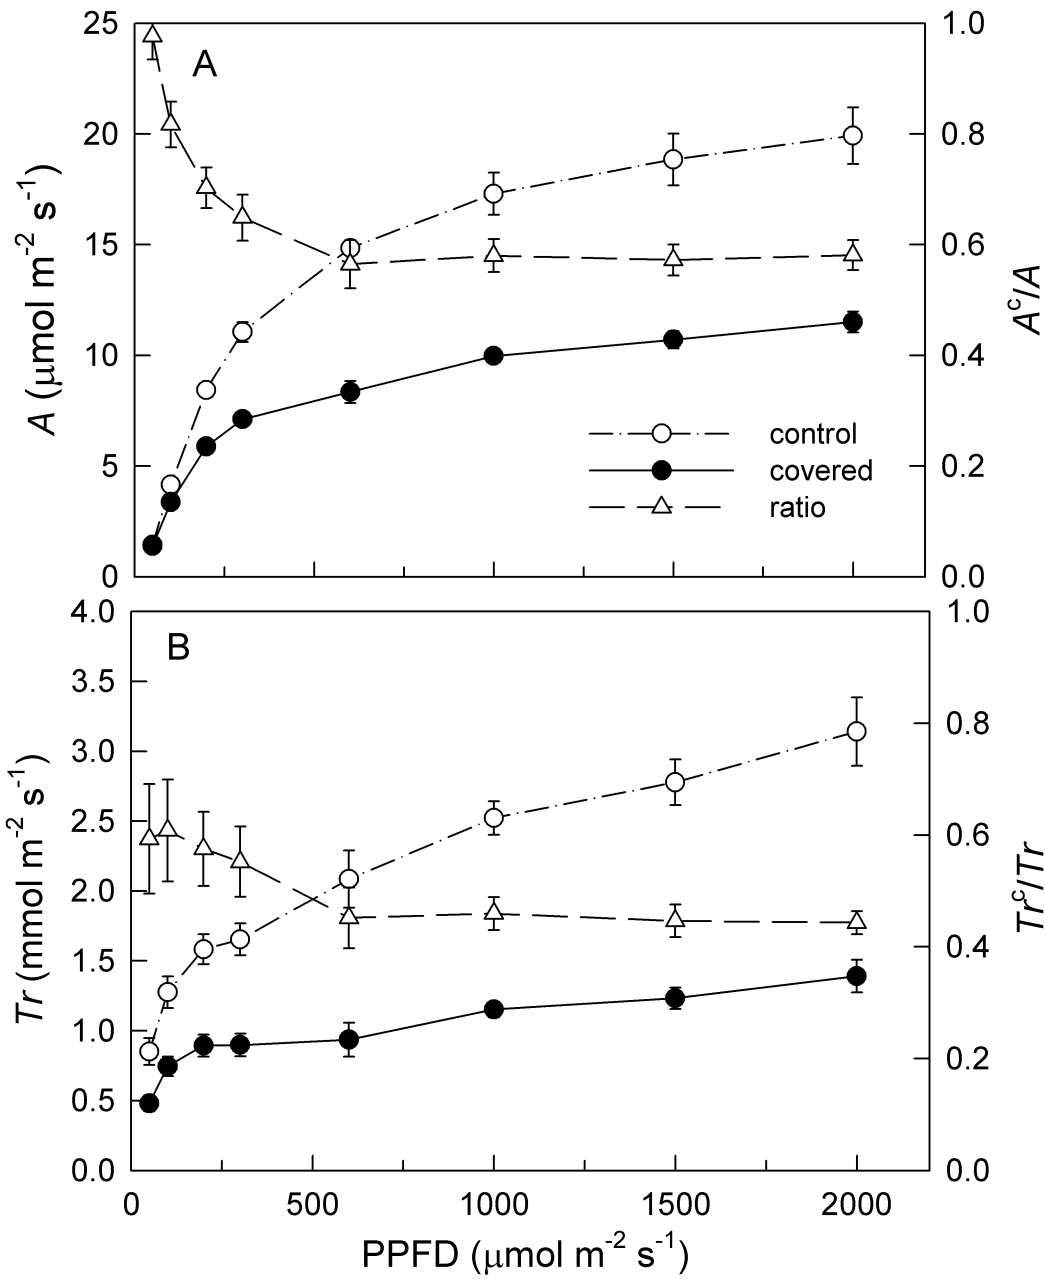

Supplement: plntphys_pp.107.107318_3.pdf [file plntphys_pp.107.107318_3.pdf]

Figure S4

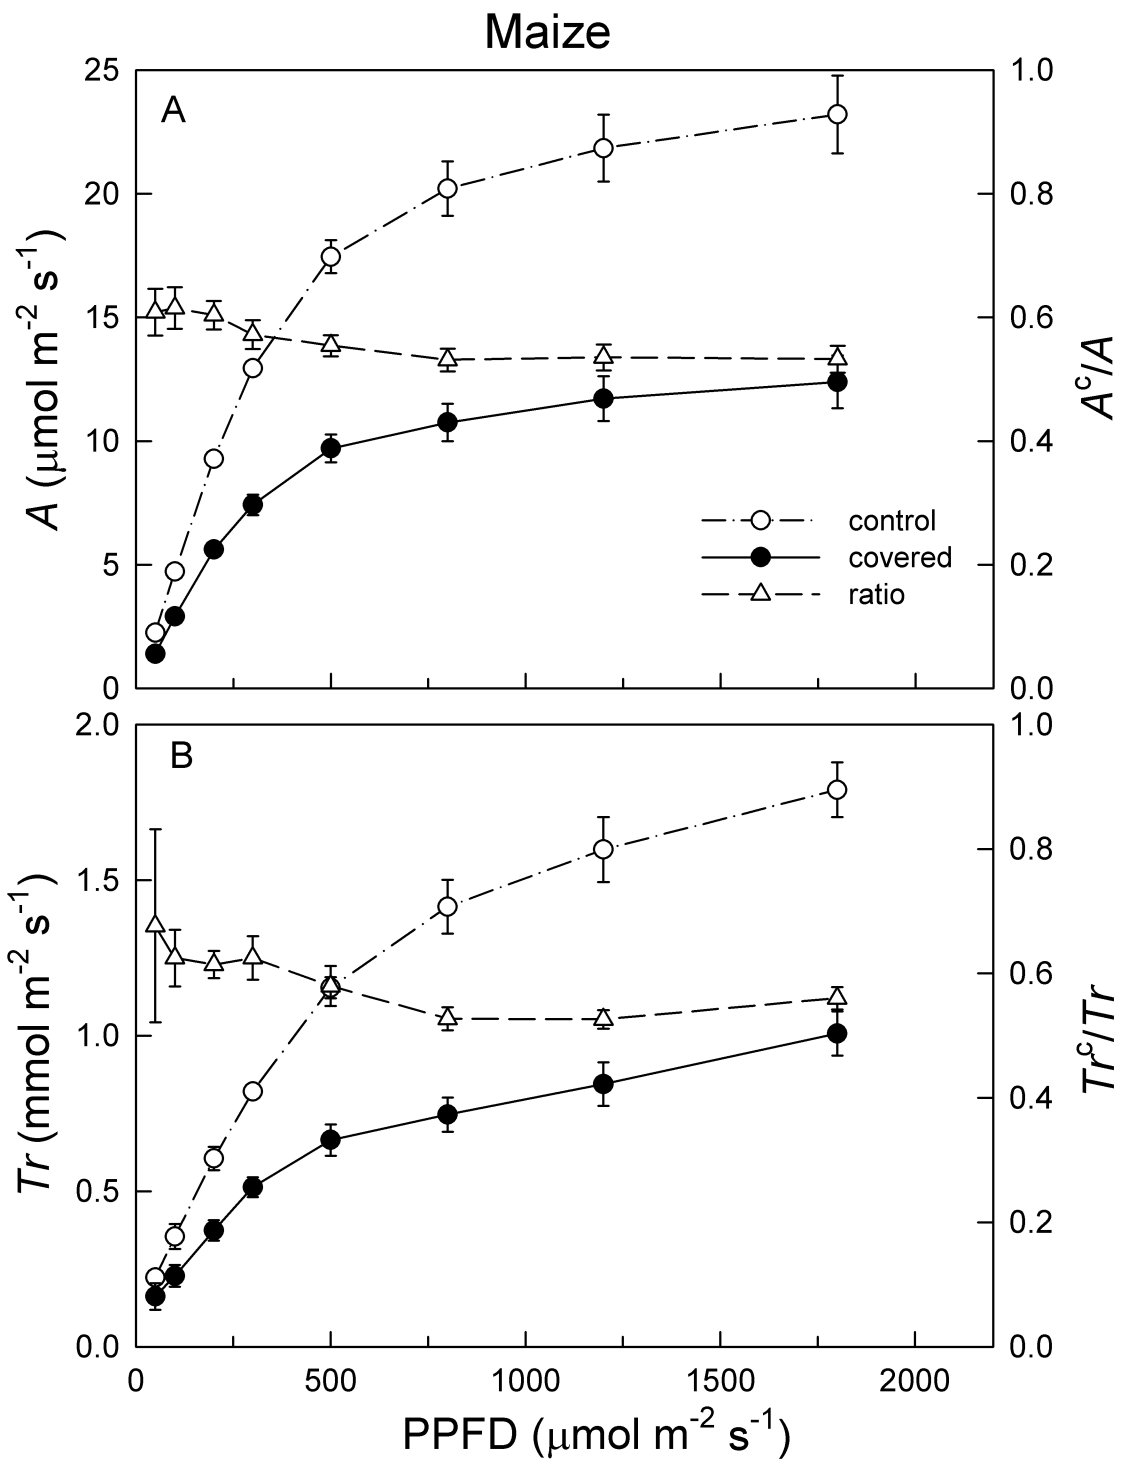

Supplement: plntphys_pp.107.107318_4.pdf [file plntphys_pp.107.107318_4.pdf]

Figure S5

### Faba bean, 4.4 mm patches

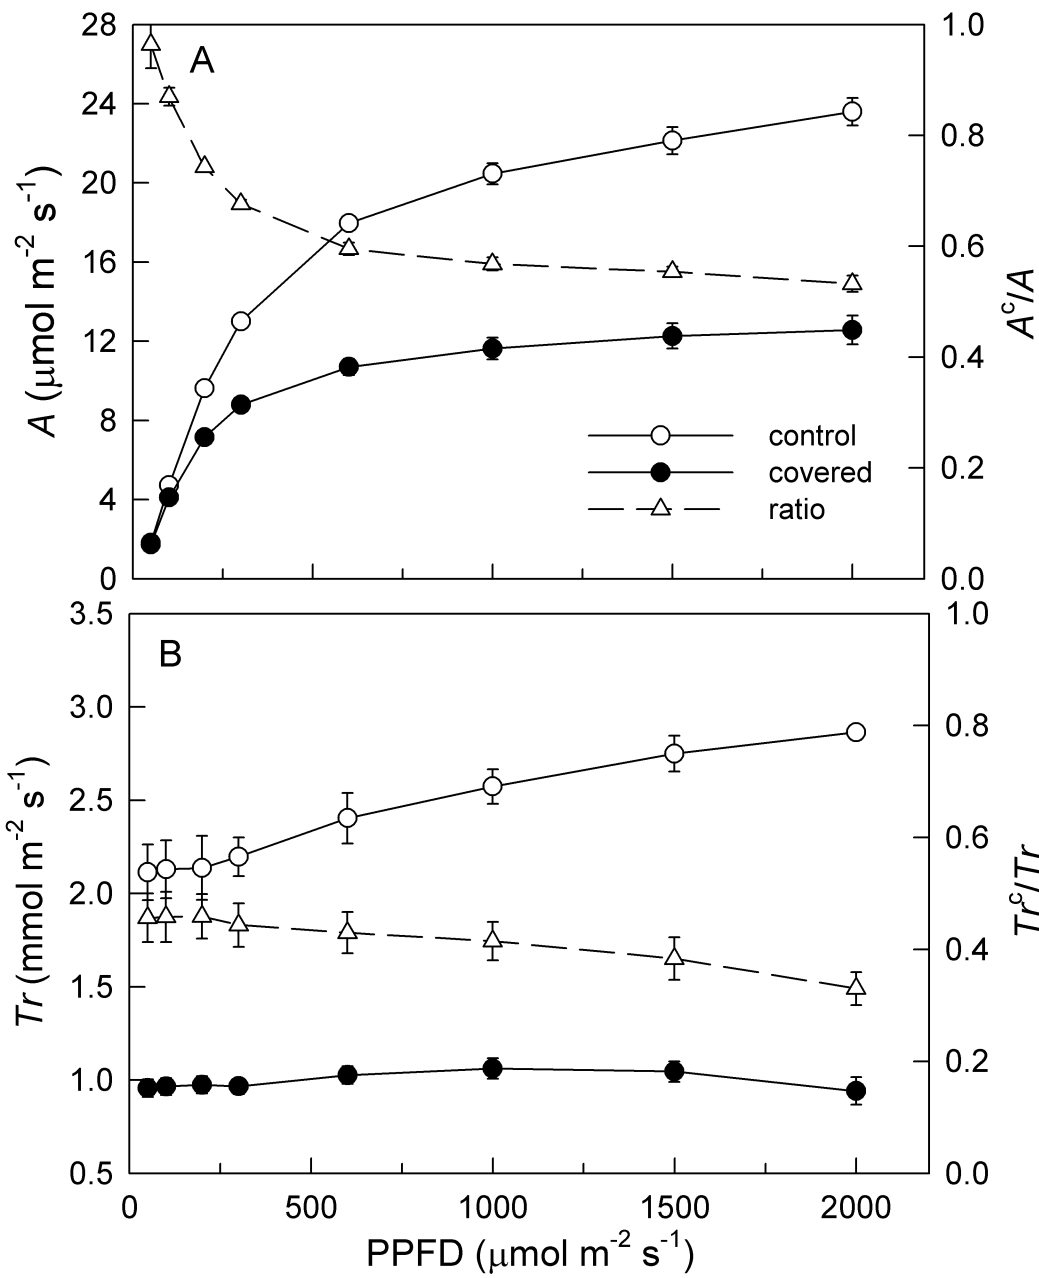

Supplement: plntphys_pp.107.107318_5.pdf [file plntphys_pp.107.107318_5.pdf]

Figure S6

Sunflower,  $C_a = 1450$

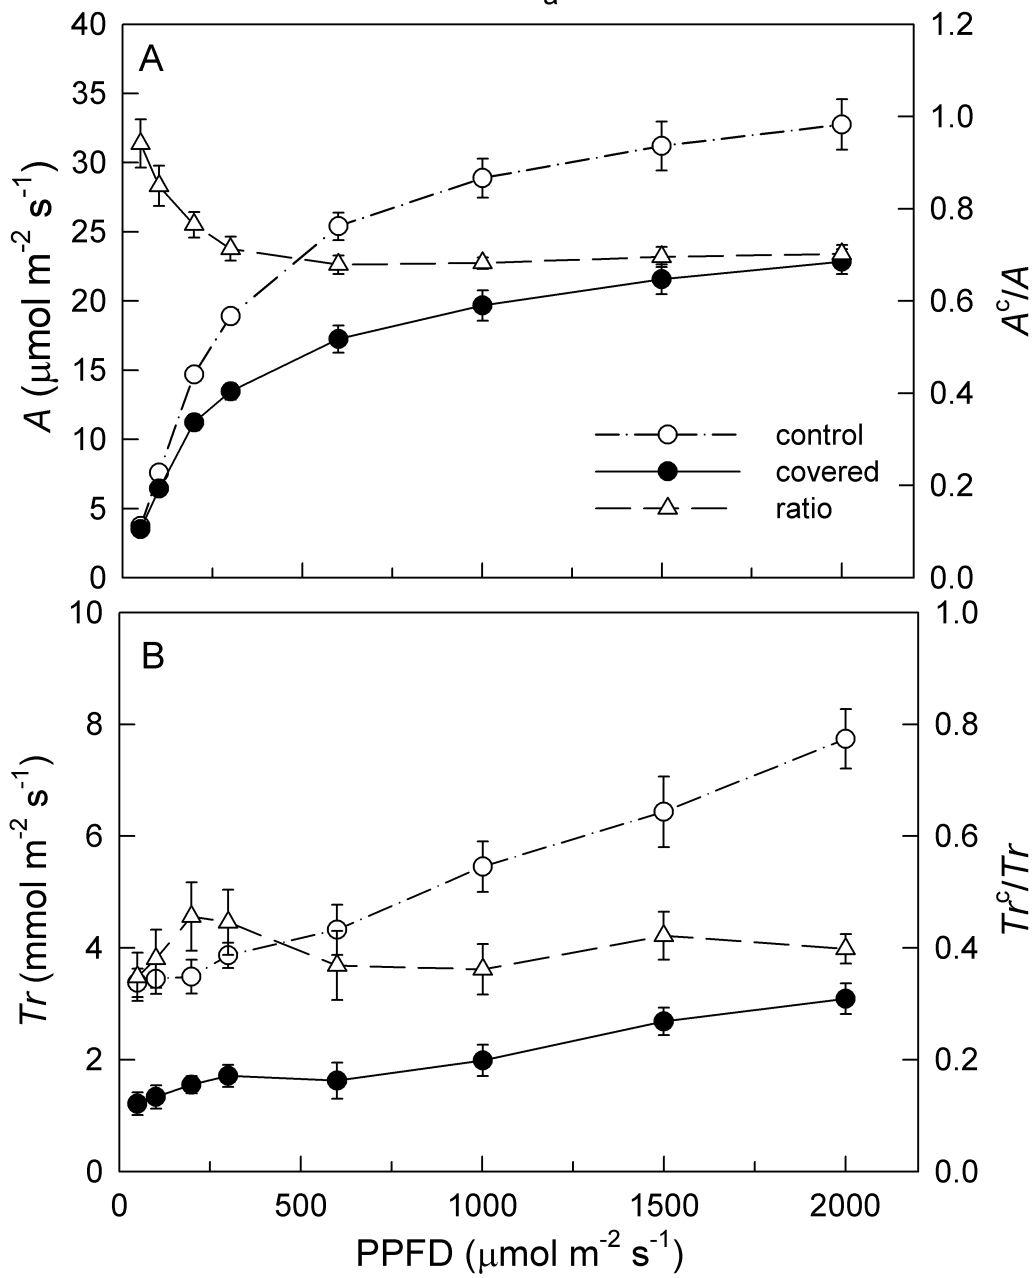

Supplement: plntphys_pp.107.107318_6.pdf [file plntphys_pp.107.107318_6.pdf]
